# Supplementary material for: A Systematic Review of Fragile X–Associated Neuropsychiatric Disorders
Source: Atypon-hosted journal article supplement (doi:10.1176/appi.neuropsych.21110282), 2022-09-29
Supplement: appi.neuropsych.21110282.ds001.pdf [file appi.neuropsych.21110282.ds001.pdf]

**Appendix:** Study quality assessed by using Joanna Briggs Institute Prevalence Critical Appraisal (JBIPCA) Checklist for prevalence studies (1)

| STUDY                        | TOTAL | Sample frame | Sample procedure | Sample size | Sample demographics | Data collection | Condition identification | Condition measurement | Statistical analysis | Response rate |
|------------------------------|-------|--------------|------------------|-------------|---------------------|-----------------|--------------------------|-----------------------|----------------------|---------------|
| Movaghar et al. 2019         | 8     | 1            | 1                | 1           | 1                   | 1               | X                        | 1                     | 1                    | 1             |
| Tassone et al. 2013          | 6     | 1            | 1                | X           | 0                   | 1               | 1                        | 1                     | 1                    | X             |
| Gabis et al. 2016            | 6     | 0            | 0                | 0           | 1                   | 1               | 1                        | 1                     | 1                    | 1             |
| Hunter et al. 2008           | 6     | 0            | 0                | 1           | 1                   | 1               | 1                        | 1                     | 1                    | 0             |
| Bailey et al. 2008           | 6     | 0            | 1                | 1           | 1                   | 1               | 0                        | 1                     | 1                    | 0             |
| Hunter et al. 2010           | 5     | 0            | 0                | 1           | 1                   | 1               | 0                        | 1                     | 1                    | 0             |
| Das et al. 2009              | 5     | 1            | 0                | 0           | 0                   | 1               | 1                        | 1                     | 1                    | X             |
| Otsuka et al. 2010           | 5     | 1            | 0                | X           | 0                   | 1               | 1                        | 1                     | 1                    | X             |
| Chan et al. 1998             | 5     | 1            | 0                | X           | 0                   | 1               | 1                        | 1                     | 1                    | X             |
| Wheeler et al. 2016          | 5     | 0            | 0                | 0           | 1                   | 1               | 1                        | 1                     | 1                    | 0             |
| Kraan et al. 2014            | 5     | 0            | 0                | X           | 1                   | 1               | 1                        | 1                     | 1                    | X             |
| White et al. 2021            | 5     | 0            | 0                | 0           | 1                   | 1               | 1                        | 1                     | 1                    | 0             |
| Bourgeois et al. 2011        | 5     | 0            | 0                | X           | 1                   | 1               | 1                        | 1                     | 1                    | X             |
| Roberts et al. 2009          | 5     | 0            | 0                | 0           | 1                   | 1               | 1                        | 1                     | 1                    | X             |
| Gossett et al. 2016          | 5     | 0            | 0                | 0           | 1                   | 1               | 1                        | 1                     | 1                    | X             |
| Kenna et al. 2013            | 5     | 0            | 0                | X           | 0                   | 1               | 1                        | 1                     | 1                    | 1             |
| Reiss et al. 1993            | 5     | 0            | 0                | X           | 0                   | 1               | 1                        | 1                     | 1                    | 1             |
| Franke et al. 1998           | 5     | 0            | 0                | 0           | 1                   | 1               | 1                        | 1                     | 1                    | X             |
| Seltzer et al. 2012          | 5     | 0            | 0                | 0           | 1                   | 1               | 1                        | 1                     | 1                    | X             |
| Cordeiro et al. 2015         | 5     | 0            | 0                | 0           | 1                   | 1               | 1                        | 1                     | 1                    | X             |
| Kraan et al. 2018            | 5     | 1            | 1                | 1           | 0                   | 1               | X                        | X                     | 1                    | X             |
| Sofocleous et al. 2008       | 5     | 1            | 1                | 1           | 0                   | 1               | X                        | X                     | 1                    | X             |
| Chonchaiya et al. 2010       | 5     | 0            | 0                | 1           | 0                   | 1               | 0                        | 1                     | 1                    | X             |
| Farzin et al. 2006           | 4     | 0            | 0                | 0           | 0                   | 1               | 1                        | 1                     | 1                    | X             |
| Dorn et al. 1994             | 4     | 0            | 0                | X           | 0                   | 1               | 1                        | 1                     | 1                    | X             |
| Thompson et al. 1994         | 4     | 0            | 0                | X           | 0                   | 1               | 1                        | 1                     | 1                    | X             |
| Sobesky et al. 1994          | 4     | 0            | 0                | X           | 0                   | 1               | 1                        | 1                     | 1                    | X             |
| Shekari Khaniani et al. 2017 | 4     | 0            | 0                | 0           | 0                   | 1               | 1                        | 1                     | 1                    | X             |
| Jiraanont et al. 2017        | 4     | 0            | 0                | 0           | 1                   | 1               | 0                        | 1                     | 1                    | X             |
| Allen et al. 2020            | 4     | X            | X                | X           | 1                   | 1               | 0                        | 1                     | 1                    | X             |

|                              |   |   |   |   |   |   |   |   |   |   |
|------------------------------|---|---|---|---|---|---|---|---|---|---|
| Patsalis et al. 1999         | 4 | 1 | X | 1 | 0 | 1 | X | X | 1 | X |
| Hofstee et al. 1994          | 3 | X | X | X | 1 | 1 | X | X | 1 | X |
| Chan et al. 1998             | 3 | 1 | 0 | X | 0 | 1 | X | X | 1 | X |
| Sharma et al. 2001           | 3 | 1 | 0 | X | 0 | 1 | X | X | 1 | X |
| Pandey et al. 2002           | 3 | 1 | 0 | X | 0 | 1 | X | X | 1 | X |
| Yen et al. 2008              | 3 | 1 | 0 | X | 0 | 1 | 0 | X | 1 | X |
| Smits et al. 1994            | 3 | 0 | 0 | X | 0 | 1 | X | 1 | 1 | X |
| Aziz et al. 2003             | 3 | 0 | 0 | 0 | 0 | 1 | 0 | 1 | 1 | X |
| Campbell et al. 2016         | 3 | 0 | 0 | 0 | 0 | 1 | 0 | 1 | 1 | X |
| Ferreira et al. 2019         | 2 | 0 | 0 | X | 0 | 1 | X | X | 1 | X |
| Rousseau et al. 1991         | 2 | X | X | X | 0 | 1 | X | X | 1 | X |
| Wang et al. 1993             | 2 | X | 0 | X | 0 | 1 | X | X | 1 | X |
| Hagerman et al. 1994         | 2 | X | X | X | 0 | 1 | X | X | 1 | X |
| Van den Ouweland et al. 1994 | 2 | X | X | X | 0 | 1 | X | X | 1 | X |
| Von Koskull et al. 1994      | 2 | X | X | X | 0 | 1 | X | X | 1 | X |
| Kaplan et al. 1994           | 2 | X | X | X | 0 | 1 | X | X | 1 | X |

## References

1. Joanna Briggs Institute. Joanna Briggs Institute Critical Appraisal Checklist for Studies Reporting Prevalence Data. Adelaide, Australia: The Joanna Briggs Institute; 2014:182-188.
